# Supplementary material for: Influence of organic, synthetic and biofertilizers on the diversity of cassava rhizosphere microbiome in Northeastern Thailand
Source: PeerJ. 2025 Oct 3;13:e20085. doi: 10.7717/peerj.20085 (PMC12499567; doi:10.7717/peerj.20085)
Supplement: Supplemental Information 6 — Predicted functional profiles of microbial communities across different treatments, sampling times, and sites based on FAPROTAX analysis. The table shows the fractional representation of each functional category, highlighting key metabolic pathways such as chemoheterotrophy, nitrogen fixation, and fermentation. [file peerj-13-20085-s006.xlsx]

## Sheet: fraction
Table S6 Predicted metabolic functions of microbial communities using FAPROTAX (Fraction). Predicted functional profiles of microbial communities across different treatments, sampling times, and sites based on FAPROTAX analysis. The table shows the fractional representation of each functional category, highlighting key metabolic pathways such as chemoheterotrophy, nitrogen fixation, and fermentat…
Metabolic function	NP_T1_M10	NP_T1_M10	NP_T1_M10	SS_T1_M10	SS_T1_M10	SS_T1_M10	NP_T1_M2	NP_T1_M2	NP_T1_M2	SS_T1_M2	SS_T1_M2	SS_T1_M2	NP_T1_M5	NP_T1_M5	NP_T1_M5	SS_T1_M5	SS_T1_M5	SS_T1_M5	NP_T2_M10	NP_T2_M10	NP_T2_M10	SS_T2_M10	SS_T2_M10	SS_T2_M10	NP_T2_M2	NP_T2_M2	NP_T2_M2	SS_T2_M2	SS_T2_M2	SS_T2_M2	NP_T2_M5	NP_T2_M5	NP_T2_M5	SS_T2_M5	SS_T2_M5	SS_T2_M5	NP_T3_M10	NP_T3_M10	NP_T3_M10	SS_T3_M10	SS_T3_M10	SS_T3_M10	NP_T3_M2	NP_T3_M2	NP_T3_M2	SS_T3_M2	SS_T3_M2	SS_T3_M2	NP_T3_M5
methanotrophy	0	0	0	0	0	0	0	0	0	0	0	0	0	0	0	0	0	0	0	0	0	0	0	0	0	0	0	0	0	0	0	0	0	0	0	0	0	0	0	0	0	0	0	0	0	0	0	0	0
acetoclastic_methanogenesis	0	0	0	0	0	0	0	0	0	0	0	0	0	0	0	0	0	0	0	0	0	0	0	0	0	0	0	0	0	0	0	0	0	0	0	0	0	0	0	0	0	0	0	0	0	0	0	0	0
methanogenesis_by_disproportionation_of_methyl_groups	0	0	0	0	0	0	0	0	0	0	0	0	0	0	0	0	0	0	0	0	0	0	0	0	0	0	0	0	0	0	0	0	0	0	0	0	0	0	0	0	0	0	0	0	0	0	0	0	0
methanogenesis_using_formate	0	0	0	0	0	0	0	0	0	0	0	0	0	0	0	0	0	0	0	0	0	0	0	0	0	0	0	0	0	0	0	0	0	0	0	0	0	0	0	0	0	0	0	0	0	0	0	0	0
methanogenesis_by_CO2_reduction_with_H2	0	0	0	0	0	0	0	0	0	0	0	0	0	0	0	0	0	0	0	0	0	0	0	0	0	0	0	0	0	0	0	0	0	0	0	0	0	0	0	0	0	0	0	0	0	0	0	0	0
methanogenesis_by_reduction_of_methyl_compounds_with_H2	0	0	0	0	0	0	0	0	0	0	0	0	0	0	0	0	0	0	0	0	0	0	0	0	0	0	0	0	0	0	0	0	0	0	0	0	0	0	0	0	0	0	0	0	0	0	0	0	0
hydrogenotrophic_methanogenesis	0	0	0	0	0	0	0	0	0	0	0	0	0	0	0	0	0	0	0	0	0	0	0	0	0	0	0	0	0	0	0	0	0	0	0	0	0	0	0	0	0	0	0	0	0	0	0	0	0
methanogenesis	0	0	0	0	0	0	0	0	0	0	0	0	0	0	0	0	0	0	0	0	0	0	0	0	0	0	0	0	0	0	0	0	0	0	0	0	0	0	0	0	0	0	0	0	0	0	0	0	0
methanol_oxidation	0.000802395	0.00086578	0.00143854	0.00214762	0.000840715	0.00101254	0.000781305	0.000163942	0.00455515	0.00135152	0.00138256	0.00148056	0.0028547	0.00144956	0.00350747	0.00114989	0.00049155	0.00112427	0.000320378	0.000949623	0.000270159	0.00150098	0.000891388	9.03036e-05	0.00123846	0.00459298	0.0013873	0.000270387	0.00057365	0.00164819	0.00152824	0.001828	0.00160929	0.000932356	0.000859243	0.00104336	0.00102129	0.000881057	0.000766573	0.00128554	0.00129587	0.00110115	0.00108906	0.000943345	0.000924619	0.000852681	0.00270426	0.000195503	0.00173696
methylotrophy	0.000802395	0.00086578	0.00143854	0.00214762	0.000840715	0.00101254	0.000781305	0.000163942	0.00455515	0.00135152	0.00138256	0.00148056	0.0028547	0.00144956	0.00350747	0.00114989	0.00049155	0.00112427	0.000320378	0.000949623	0.000270159	0.00150098	0.000891388	9.03036e-05	0.00123846	0.00459298	0.0013873	0.000270387	0.00057365	0.00164819	0.00152824	0.001828	0.00160929	0.000932356	0.000859243	0.00104336	0.00102129	0.000881057	0.000766573	0.00128554	0.00129587	0.00110115	0.00108906	0.000943345	0.000924619	0.000852681	0.00270426	0.000195503	0.00173696
aerobic_ammonia_oxidation	0.00217572	0.00228029	0.00308864	0.00310343	0.0091728	0.00283795	0.000390653	0.000288312	0.0043481	0.0223615	0.0281392	0.0104678	0.0119133	0.00740688	0.0151883	0.0100143	0.0177128	0.0167359	0.0114563	0.00704597	0.00640818	0.00228034	0.00407296	0.00425556	0.00790581	0.000454575	0.000744596	0.0114915	0.0145325	0.0148936	0.0156048	0.0118986	0.00700587	0.0110275	0.0109951	0.0177155	0.00435883	0.0118355	0.00823233	0.0030248	0.005478	0.00415325	0.00287116	0.0122453	0.000710497	0.0140327	0.00981435	0.0217009	0.0116708
aerobic_nitrite_oxidation	0	0	0	0	0	0	0	0	0	0	0	0	0	0	0	0	0	0	0	0	0	0	0	0	0	0	0	0	0	0	0	0	0	0	0	0	0	0	0	0	0	0	0	0	0	0	0	0	0
nitrification	0.00217572	0.00228029	0.00308864	0.00310343	0.0091728	0.00283795	0.000390653	0.000288312	0.0043481	0.0223615	0.0281392	0.0104678	0.0119133	0.00740688	0.0151883	0.0100143	0.0177128	0.0167359	0.0114563	0.00704597	0.00640818	0.00228034	0.00407296	0.00425556	0.00790581	0.000454575	0.000744596	0.0114915	0.0145325	0.0148936	0.0156048	0.0118986	0.00700587	0.0110275	0.0109951	0.0177155	0.00435883	0.0118355	0.00823233	0.0030248	0.005478	0.00415325	0.00287116	0.0122453	0.000710497	0.0140327	0.00981435	0.0217009	0.0116708
sulfate_respiration	0.00130389	0.000414599	0.000338481	0.000896808	0.00337787	0.00136906	3.55139e-05	1.69595e-05	0.00047622	0.00405455	0.00418835	0.00161043	0.00703561	0.000972264	0.00201117	0.00331868	0.0034917	0.00687368	0.00151351	0.00146547	0.000561931	0.00135666	0.00252331	0.0012191	0.000627714	2.95179e-05	4.70271e-05	0.00116266	0.00328255	0.00212766	0.0032808	0.00287495	0.000919596	0.0044528	0.0034688	0.00521682	0.000941186	0.00267254	0.00282188	0.00118471	0.00100135	0.000502699	0.000198011	0.003211	0.000155725	0.00399542	0.00154963	0.00452916	0.00134663
sulfur_respiration	0	0	0	0	3.00255e-05	0	0	0	0	0	0	0	0	0	0	0	0	0	0	0	0	0	0	0	0	0	0	0	0	0	0	0.000166182	0	0	0	0	0	0	0	0	0.00017671	2.3938e-05	9.90054e-05	0.00230394	0.000194657	0.000682145	0.000395005	0.000391007	7.80655e-05
dark_sulfite_oxidation	0	0	0	0	0	0	0	0	0	0	0	0	0	0	0	0	0	0	0	0	0	0	0	0	0	0	0	0	0	0	0	0	0	0	0	0	0	0	0	0	0	0	0	0	0	0	0	0	0
sulfite_respiration	0	0	0	0	0	0	0	0	0	0	0	0	0	0	0	0	0	0	0	0	0	0	0	0	0	0	0	0	0	0	0	0	0	0	0	0	0	0	0	0	0	0	0	0	0	0	0	0	0
thiosulfate_respiration	0	0	0	0	0	0	0	0	0	0	0	0	0	0	0	0	0	0	0	0	0	0	0	0	0	0	0	0	0	0	0	8.3091e-05	0	0	0	0	0	0	0	0	0	0	0	0.000199554	0	0	0	0.000325839	0
respiration_of_sulfur_compounds	0.00130389	0.000414599	0.000338481	0.000896808	0.0034079	0.00136906	3.55139e-05	1.69595e-05	0.00047622	0.00405455	0.00418835	0.00161043	0.00703561	0.000972264	0.00201117	0.00331868	0.0034917	0.00687368	0.00151351	0.00146547	0.000561931	0.00135666	0.00252331	0.0012191	0.000627714	2.95179e-05	4.70271e-05	0.00116266	0.00328255	0.00212766	0.0032808	0.00312422	0.000919596	0.0044528	0.0034688	0.00521682	0.000941186	0.00267254	0.00282188	0.00118471	0.00117806	0.000526637	0.000297016	0.00571449	0.000350382	0.00467756	0.00194464	0.00524601	0.0014247
arsenate_detoxification	0	0	0	0	0	0	0	0	0	0	0	0	0	0	0	0	0	0	0	0	0	0	0	0	0	0	0	0	0	0	0	0	0	0	0	0	0	0	0	0	0	0	0	0	0	0	0	0	0
arsenate_respiration	0	0	0	0	0	0	0	0	0	0	0	0	0	0	0	0	0	0	0	0	0	0	0	0	0	0	0	0	0	0	0	0	0	0	0	0	0	0	0	0	0	0	0	0	0	0	0	0	0
dissimilatory_arsenate_reduction	0	0	0	0	0	0	0	0	0	0	0	0	0	0	0	0	0	0	0	0	0	0	0	0	0	0	0	0	0	0	0	0	0	0	0	0	0	0	0	0	0	0	0	0	0	0	0	0	0
arsenite_oxidation_detoxification	0	0	0	0	0	0	0	0	0	0	0	0	0	0	0	0	0	0	0	0	0	0	0	0	0	0	0	0	0	0	0	0	0	0	0	0	0	0	0	0	0	0	0	0	0	0	0	0	0
arsenite_oxidation_energy_yielding	0	0	0	0	0	0	0	0	0	0	0	0	0	0	0	0	0	0	0	0	0	0	0	0	0	0	0	0	0	0	0	0	0	0	0	0	0	0	0	0	0	0	0	0	0	0	0	0	0
dissimilatory_arsenite_oxidation	0	0	0	0	0	0	0	0	0	0	0	0	0	0	0	0	0	0	0	0	0	0	0	0	0	0	0	0	0	0	0	0	0	0	0	0	0	0	0	0	0	0	0	0	0	0	0	0	0
anammox	0	0	0	0	0	0	0	0	0	0	0	0	0	0	0	0	0	0	0	0	0	0	0	0	0	0	0	0	0	0	0	0	0	0	0	0	0	0	0	0	0	0	0	0	0	0	0	0	0
nitrate_denitrification	0.00091041	0.00162181	0.00217897	0.00185262	0.00414352	0.00225325	0.00124299	0.000163942	0.00132513	0.00864152	0.00886467	0.00335074	0.00222532	0.00219201	0.00312133	0.00327501	0.0045765	0.00574942	0.00481672	0.00365781	0.0023666	0.00320402	0.00303072	0.00195282	0.00113667	0.000879632	0.000297838	0.00640818	0.00675633	0.00617321	0.00300039	0.00336518	0.00399298	0.00487076	0.00548961	0.00515161	0.00174887	0.00469897	0.00384397	0.00312563	0.000765742	0.00125675	5.4003e-05	0.000907062	0.000145993	0.00867298	0.00578834	0.00397524	0.00284939
nitrite_denitrification	0.00091041	0.00162181	0.00217897	0.00185262	0.00414352	0.00225325	0.00124299	0.000163942	0.00132513	0.00864152	0.00886467	0.00335074	0.00222532	0.00219201	0.00312133	0.00327501	0.0045765	0.00574942	0.00481672	0.00365781	0.0023666	0.00320402	0.00303072	0.00195282	0.00113667	0.000879632	0.000297838	0.00640818	0.00675633	0.00617321	0.00300039	0.00336518	0.00399298	0.00487076	0.00548961	0.00515161	0.00174887	0.00469897	0.00384397	0.00312563	0.000765742	0.00125675	5.4003e-05	0.000907062	0.000145993	0.00867298	0.00578834	0.00397524	0.00284939
nitrous_oxide_denitrification	0	0	0	0	0	0	0	0	0	0	0	0	0	0	0	0	0	0	0	0	0	0	0	0	0	0	0	0	0	0	0	0	0	0	0	0	0	0	0	0	0	0	0	0	0	0	0	0	0
denitrification	0.00091041	0.00162181	0.00217897	0.00185262	0.00414352	0.00225325	0.00124299	0.000163942	0.00132513	0.00864152	0.00886467	0.00335074	0.00222532	0.00219201	0.00312133	0.00327501	0.0045765	0.00574942	0.00481672	0.00365781	0.0023666	0.00320402	0.00303072	0.00195282	0.00113667	0.000879632	0.000297838	0.00640818	0.00675633	0.00617321	0.00300039	0.00336518	0.00399298	0.00487076	0.00548961	0.00515161	0.00174887	0.00469897	0.00384397	0.00312563	0.000765742	0.00125675	5.4003e-05	0.000907062	0.000145993	0.00867298	0.00578834	0.00397524	0.00284939
chitinolysis	0.000316329	0	0.000158663	0.000401204	0.000690587	0.000213916	0.00117196	0.00268525	0.000890324	0.000737191	0.00150455	0.00316891	0	0.000159098	0	0.00474513	0.00140685	0.000839643	0.000718089	0	0.000151289	0.000375245	0.000644542	0.000857885	0.00171349	0.00164119	0.00134027	0.00116266	0.00191217	0.00113875	0.000140205	0.00186124	0	0.00218621	0.00108201	0.00256494	0.00200252	0.000802741	6.66585e-05	0.000504134	0.000795193	9.57522e-05	0.00115206	0.0020681	0.000632634	0.00338636	0.00366139	0.0040404	0.000234197
knallgas_bacteria	0	0	0	0	0	0	0	0	0	0	0	0	0	0	0	0	0	0	0	0	0	0	0	0	0	0	0	0	0	0	0	0	0	0	0	0	0	0	0	0	0	0	0	0	0	0	0	0	0
dark_hydrogen_oxidation	0.000293183	4.87763e-05	8.46203e-05	0	0	0	0	0	6.21157e-05	0	0	0.000181823	0	0	0.000128715	0.000451224	0.000711901	0.000199237	0	0	8.6451e-05	0	0	6.77277e-05	0.0012215	3.54214e-05	0.000713244	0.000162232	0	0	0.000182267	0.00361446	0	0	0	0	0.00434548	0.000107685	0.000111098	0.000126033	0	0	0.00162009	0.00014513	0.00078836	0	0.000136732	0	0.00178575
nitrogen_fixation	0.0159862	0.0217299	0.0279035	0.0170748	0.0103588	0.010981	0.00468783	0.00242521	0.0156117	0.0396445	0.0193559	0.0110912	0.0190388	0.0232813	0.021254	0.0216005	0.00703426	0.0181733	0.0181179	0.0246902	0.0232553	0.0122532	0.0167992	0.0148888	0.010247	0.00536635	0.00460866	0.0185756	0.00933775	0.0242433	0.0257136	0.0166681	0.0208482	0.0194509	0.0220539	0.0228671	0.0191842	0.0208908	0.023075	0.0128302	0.0100725	0.00600845	0.00509428	0.0170346	0.00430191	0.0275294	0.0150558	0.0171717	0.0238393
nitrate_ammonification	0	0	0	0	0	0	0	0	0	0	0	0	0	0	0	0	0	0	0	0	0	0	0	0	0	0	0	0	0	0	0	8.3091e-05	0	0	0	0	0	0	0	0	0	0	0	0.000199554	0	0	0	0.000325839	0
nitrite_ammonification	0	0	0	0	0	0	0	0	0	0	0	0	0	0	0	0	0	0	0	0	0	0	0	0	0	0	0	0	0	0	0	8.3091e-05	0	0	0	0	0	0	0	0	0	0	0	0.000199554	0	0	0	0.000325839	0
nitrite_respiration	0.00091041	0.00162181	0.00217897	0.00185262	0.00414352	0.00225325	0.00124299	0.000163942	0.00132513	0.00864152	0.00886467	0.00335074	0.00222532	0.00219201	0.00312133	0.00327501	0.0045765	0.00574942	0.00481672	0.00365781	0.0023666	0.00320402	0.00303072	0.00195282	0.00113667	0.000879632	0.000297838	0.00640818	0.00675633	0.00617321	0.00300039	0.00344828	0.00399298	0.00487076	0.00548961	0.00515161	0.00174887	0.00469897	0.00384397	0.00312563	0.000765742	0.00125675	5.4003e-05	0.00110662	0.000145993	0.00867298	0.00578834	0.00430108	0.00284939
cellulolysis	0.0391708	0.0820906	0.0599429	0.0329577	0.0055247	0.0289642	0.00866539	0.00431902	0.0139967	0.00753573	0.00516428	0.00083119	0.0389543	0.0755361	0.0483967	0.0246281	0.00571215	0.0244208	0.0238406	0.0549257	0.0577168	0.0387946	0.0338727	0.00185122	0.00549674	0.00663561	0.00565893	0.00689487	0	0.00671262	0.0281392	0.0152057	0.0410914	0.0164931	0.0483245	0.0289751	0.0196715	0.0319236	0.0478386	0.0237573	0.00497732	0.00268106	0.0072184	0.00678483	0.0141321	0.00881916	0.00533256	0.00205279	0.0354808
xylanolysis	0.000702095	0	0.000253861	0.00103841	0.000570485	0.000442093	0	0	0	0	0.000731945	7.79241e-05	0.000292214	0	0.000209161	0.000218334	0.000898351	0.000313087	0.000707042	0.000304817	0	0.00199169	0.000671969	0.000654701	0.000203583	0	0	0.000675968	0	0.000689242	0	0.000772746	0.000145199	0.000417953	0.000365974	0.000412999	0.00102796	0.00020558	0.000999878	0.000252067	0.000471226	0.00073011	0.000252014	0.00154201	0.000418512	0.000487246	4.55775e-05	0	0
dark_sulfide_oxidation	0	0	0	0	0	0	0	0	0	0	0	0	0	0	0	0	0	0	0	0	0	0	0	0	0	0	0	0	0	0	0	0	0	0	0	0	0	0	0	0	0	0	0	0	0	0	0	0	0
dark_sulfur_oxidation	0	0	0	0	0	0	0	0	0	0	0	0	0	0	0	0	0	0	0	0	0	0	0	0	0	0	0	0	0	0	0	0	0	0	0	0	0	0	0	0	0	0	0	0	0	0	0	0	0
dark_thiosulfate_oxidation	0.000100299	0	0	0	0	0	0.00105358	0.000163942	0	0	0	0	0	0	0	0	0	0.000668868	0	0	0	0	0	0.000146743	0	0.000791079	0	0.00043262	0	0	0.000308452	0.0015538	0.001089	0	0	0	0	0.000293686	0	0	0	0	0	0	0	0	0.00138252	0	0.000761139
dark_oxidation_of_sulfur_compounds	0.00487609	0.000146329	0.000465411	0.000177002	0	0	0.00113644	0.000237433	0.000269168	0	0	0.00103899	0	0	0	0.000567669	0.000949201	0.0010958	0.000342473	9.37899e-05	0.000561931	0	0.000329128	0.00109493	0.000458062	0.000968186	0.000415406	0.00043262	0	0.00170812	0.000939375	0.00204404	0.00124629	0.00109311	0.000222767	0.000282578	0.00102796	0.00123348	0.000133317	0.00015124	0.000412323	0.000131659	0.000234013	0.000816356	0.000233588	0.000487246	0.0026283	0.000488759	0.00137591
manganese_oxidation	0.019759	0.0734328	0.0645335	0.0612544	0.0413752	0.059326	0.031489	0.0120073	0.0564631	0.092067	0.0624187	0.0507805	0.0864952	0.0534922	0.0847908	0.0262147	0.0249335	0.0212045	0.0520449	0.0943996	0.0550693	0.0610351	0.078689	0.0286714	0.0632125	0.0140505	0.0122741	0.0490482	0.055899	0.0433923	0.0658123	0.0172165	0.0711598	0.0305909	0.0432168	0.0431692	0.0205526	0.064141	0.080679	0.0519888	0.0499794	0.0686304	0.0170109	0.0154563	0.0057521	0.106634	0.0387408	0.0536657	0.0453658
manganese_respiration	0	0	0	0	0	0	0	0	0	0	0	0	0	0	0	0	0	0	0	0	0	0	0	0	0	0	0	0	0	0	0	0	0	0	0	0	0	0	0	0	0	0	0	0	0	0	0	0	0
ligninolysis	0.000192883	0.000743839	0.00104718	0.000554605	0.00106591	0.000770097	0.0139688	0.00334102	0.0225066	0.00356309	0.00276513	0.0065716	0.00168585	0.00127278	0.000563126	0.000320224	0.00120345	0.000370012	0.000828564	0.000691701	0.00573818	0.000577301	0.00105595	0.00110622	0.0381888	0.000283371	0.00811218	0.00451547	0.00203965	0.00542403	0.000743088	0.0002742	0.00330329	0.000594779	0	0.000912944	0.000200252	0.00198727	0.00177756	0.000655374	0	0.000706172	0.00454525	0.00546052	0.00598569	0.00177845	0.00054693	0.00123819	0.000634282
fermentation	0.0256149	0.000548734	0.00517241	0.00279663	0.00261222	0.00216768	0.0400241	0.0384868	0.00362341	0.000696236	0.00516428	0.0178966	0.00123629	0.000777811	0.000353965	0.024861	0.0169331	0.00399898	0.000961135	0.00056274	0.000248547	0.00636474	0.00176906	0.00417654	0.0140642	0.0610311	0.0569263	0.0305538	0.00407929	0.00716212	0.0153945	0.0571998	0.0296449	0.0043885	0.011377	0.0052603	0.00924498	0.00493392	0.00176645	0.00277274	0.00618484	0.00343511	0.0334368	0.0423598	0.0425228	0.013716	0.0177752	0.00941675	0.0269912
aerobic_chemoheterotrophy	0.384093	0.377821	0.369632	0.378595	0.383141	0.38897	0.227182	0.141945	0.339069	0.300938	0.30331	0.302475	0.361536	0.38263	0.354673	0.305464	0.363188	0.352052	0.382797	0.363881	0.384631	0.377064	0.372929	0.398487	0.283455	0.178152	0.199215	0.274686	0.343553	0.333174	0.33746	0.275048	0.296158	0.360757	0.330793	0.340833	0.38923	0.346872	0.365977	0.379978	0.389085	0.379478	0.332892	0.329935	0.277376	0.291057	0.294035	0.347214	0.31798
invertebrate_parasites	0	0	0	0	0	0	0	0	0	0	0	0	0	0	0	0	0	0	0	0	0	0	0	0	0	0	0	0	0	0	0	0	0	0	0	0	0	0	0	0	0	0	0	0	0	0	0	0	0
human_pathogens_septicemia	0.000100299	0	0	0	0	0	0.00980183	0.0492221	0.00091103	0	0	0	0	0	0	0	0	0.000668868	0	0	0	0	0	0.000146743	0.000797367	0.0107445	0.00993839	0.00043262	0	0	0.000308452	0.00160366	0.001089	0	0	0	0	0.000293686	0	0	0	0	0.00274515	0	0.00680325	0	0.00185348	0	0.000761139
human_pathogens_pneumonia	0.000100299	0	0	0	0	0	0.00980183	0.0492221	0.00091103	0	0	0	0	0	0	0	0	0.000668868	0	0	0	0	0	0.000146743	0.000797367	0.0107445	0.00993839	0.00043262	0	0	0.000308452	0.00160366	0.001089	0	0	0	0	0.000293686	0	0	0	0	0.00274515	0	0.00680325	0	0.00185348	0	0.000761139
human_pathogens_nosocomia	0	0.00170717	0	0	0	0	0.00874825	0.0531906	0.00091103	0	0.00166721	0.000701317	0	0	0	0.000101889	0	0.000327318	0	0	0	0	0	0	0.000797367	0.0122853	0.00993839	0.00110859	0	0.00341624	0	4.98546e-05	0	8.03755e-05	0.00108201	0	0	0	4.4439e-05	0	0	0	0.00274515	0.00043539	0.00680325	0	0.0128377	0	0
human_pathogens_meningitis	0	0	0	0	0	0	0	0	0	0	0	0	0	0	0	0	0	0	0	0	0	0	0	0	0	0	0	0	0	0	0	0	0	0	0	0	0	0	0	0	0	0	0	0	0	0	0	0	0
human_pathogens_gastroenteritis	0	0	0	0	0	0	0	0	0	0	0	0	0	0	0	0	0	0	0	0	0	0	0	0	0	0	0	0	0	0	0	0	0	0	0	0	0	0	0	0	0	0	0	0	0	0	0	0	0
human_pathogens_diarrhea	0	0	0	0	0	0	0	0	0	0	0	0	0	0	0	0	0	0	0	0	0	0	0	0	0	0	0	0	0	0	0	0	0	0	0	0	0	0	0	0	0	0	0	0	0	0	0	0	0
human_pathogens_all	0.00933556	0.00264612	0.000888513	0.00161661	0.000615523	0.000684531	0.0116604	0.0587986	0.00627368	0.00262112	0.00300911	0.00288319	0.00193311	0.000830844	0.000563126	0.00238712	0.0019662	0.00297433	0.0017676	0.000539292	0.000572738	0.00108244	0.000740538	0.00170448	0.00603963	0.0179469	0.0144687	0.00191975	0.000446172	0.00539407	0.0149038	0.0393103	0.0306129	0.00231481	0.00214811	0.00215194	0.0103864	0.00253549	0.00165535	0.00199133	0.00138423	0.00359071	0.00624634	0.00578706	0.00891528	0.00255804	0.0188691	0.00110785	0.0257811
fish_parasites	0	0	0	0	0	0	0	0	0	0	0	0	0	0	0	0	0	0	0	0	0	0	0	0	0	0	0	0	0	0	0	0	0	0	0	0	0	0	0	0	0	0	0	0	0	0	0	0	0
human_gut	0	0.00032924	0.00354347	0.000106201	0	2.85221e-05	0.0344248	0.033088	0.00231898	0	0.00199252	0.0130393	0	0	0	0.0196646	0.000610201	0.000341549	0	7.03425e-05	0	0.000216488	8.2282e-05	0	0.012707	0.0531971	0.0551079	0.0260383	0	0.00359604	0	0.00224346	0.0001089	0.000546553	0.00566464	0.000217368	0	0.0021537	0.000222195	0.00011343	0	9.57522e-05	0.0290446	0.00841754	0.0367706	0.000998855	0.00903953	0	0.00042936
human_associated	0.00933556	0.00297536	0.00443199	0.00172282	0.000615523	0.000713053	0.0460852	0.0918866	0.00859267	0.00262112	0.00500163	0.0159225	0.00193311	0.000830844	0.000563126	0.0220518	0.0025764	0.00331588	0.0017676	0.000609635	0.000572738	0.00129893	0.00082282	0.00170448	0.0187466	0.0711439	0.0695766	0.027958	0.000446172	0.00899011	0.0149038	0.0415538	0.0307218	0.00286137	0.00781275	0.00236931	0.0103864	0.00468918	0.00187755	0.00210476	0.00138423	0.00368646	0.0352909	0.0142046	0.0456859	0.0035569	0.0279086	0.00110785	0.0262105
mammal_gut	0	0.00032924	0.00354347	0.000106201	0	2.85221e-05	0.0344248	0.033088	0.00231898	0	0.00199252	0.0130393	0	0	0	0.0196646	0.000610201	0.000341549	0	7.03425e-05	0	0.000216488	8.2282e-05	0	0.012707	0.0531971	0.0551079	0.0260383	0	0.00359604	0	0.00224346	0.0001089	0.000546553	0.00566464	0.000217368	0	0.0021537	0.000222195	0.00011343	0	9.57522e-05	0.0290446	0.00841754	0.0367706	0.000998855	0.00903953	0	0.00042936
animal_parasites_or_symbionts	0.00956702	0.00297536	0.00443199	0.00172282	0.000615523	0.000713053	0.0460852	0.0918866	0.00859267	0.00262112	0.00500163	0.0159225	0.00193311	0.000830844	0.000563126	0.0220518	0.0025764	0.00331588	0.0017676	0.000609635	0.000572738	0.00129893	0.00082282	0.00170448	0.0187466	0.0711439	0.0695766	0.027958	0.000446172	0.00899011	0.0149038	0.0422351	0.0307218	0.00286137	0.00781275	0.00236931	0.0103864	0.00468918	0.00214418	0.00210476	0.00138423	0.00368646	0.0353269	0.0142046	0.0459487	0.0035569	0.0279086	0.00110785	0.0262105
plant_pathogen	0.000393482	0.000743839	0.00130104	0.000920408	0.00106591	0.000770097	0.0161588	0.00668204	0.0225066	0.00356309	0.00276513	0.00724694	0.00197806	0.00127278	0.00096536	0.000320224	0.00120345	0.00103888	0.000828564	0.000996518	0.00573818	0.000577301	0.0013028	0.00125296	0.0386469	0.00256805	0.00926434	0.00581332	0.00203965	0.00596344	0.00105154	0.001828	0.00461008	0.000594779	0	0.000912944	0.000240303	0.00228096	0.00177756	0.000655374	0	0.000706172	0.00515728	0.00546052	0.00598569	0.00177845	0.0022181	0.00123819	0.00139542
oil_bioremediation	0	0	0	0	0	0	0	0	0	0	0	0	0	0	0	0	0	0	0	0	0	0	0	0	0	0	0	0	0	0	0	0	0	0	0	0	0	0	0	0	0	0	0	0	0	0	0	0	0
aromatic_hydrocarbon_degradation	0.000100299	3.65822e-05	0.000116353	0.000200602	0.000120102	0.000299482	0.00113644	0.000163942	0.000351989	0.00151534	0.00126057	0.00155848	0	0.000106065	0	0.000305668	0.000762751	0.000910799	0	0	0	0.000447408	0.000329128	0.000632126	0.00130632	0.000968186	0.000517298	0.000757084	0.000286825	0.000389571	0.000308452	0.00167013	0.001089	0.000498328	0.000493269	0.000326052	0.000480606	0.00110622	0	0.000667977	0.000530129	0.00025135	0.000477026	0.00246721	0.000856489	0.00531098	0.00325119	0	0.000887995
aromatic_compound_degradation	0.0204148	0.010304	0.014523	0.0425276	0.0429515	0.0359379	0.0577693	0.0745596	0.0257987	0.0130647	0.0160215	0.0198966	0.0170158	0.00447241	0.0118739	0.0239731	0.0350526	0.026897	0.0255087	0.0125561	0.0103957	0.0361246	0.0327208	0.0447906	0.0248032	0.0720354	0.0429984	0.0189541	0.0219581	0.0193287	0.0126185	0.0152971	0.00802226	0.0315394	0.0221971	0.0321704	0.027795	0.028184	0.0150982	0.0518754	0.0470048	0.0399646	0.0105306	0.0126444	0.0490146	0.0166882	0.0267084	0.0150212	0.0137786
aliphatic_non_methane_hydrocarbon_degradation	0	3.65822e-05	0.000116353	0.000200602	0.000120102	0.000299482	8.28657e-05	0	0.000351989	0.00151534	0.00126057	0.00155848	0	0.000106065	0	0.000305668	0.000762751	0.000241931	0	0	0	0.000447408	0.000329128	0.000485382	0.00130632	0.000177107	0.000517298	0.000324465	0.000286825	0.000389571	0	0.000116327	0	0.000498328	0.000493269	0.000326052	0.000480606	0.000812531	0	0.000667977	0.000530129	0.00025135	0.000477026	0.00246721	0.000856489	0.00531098	0.00186868	0	0.000126856
hydrocarbon_degradation	0.000100299	3.65822e-05	0.000116353	0.000200602	0.000120102	0.000299482	0.00113644	0.000163942	0.000351989	0.00151534	0.00126057	0.00155848	0	0.000106065	0	0.000305668	0.0010509	0.00112427	0	0	0	0.000447408	0.000329128	0.000632126	0.00130632	0.000968186	0.000517298	0.000757084	0.000286825	0.000389571	0.000308452	0.00167013	0.001089	0.00072338	0.000859243	0.000326052	0.000480606	0.00110622	0	0.000667977	0.000530129	0.00025135	0.000477026	0.00246721	0.000856489	0.00531098	0.00325119	0	0.00112219
dark_iron_oxidation	0	0	0	0	0	0	0	0	0	0	0	0	0	0	0	0	0	0	0	0	0	0	0	0	0	0	0	0	0	0	0	0	0	0	0	0	0	0	0	0	0	0	0	0	0	0	0	0	0
iron_respiration	0	0.000256076	0.000116353	0	0	0	0	0	0	0	0	0	0	0	0.00024134	0	0	0	0	0	0	0	0	0	0	0	0	0	0	0	0.000294431	0	0.000169399	0	0	0	0	0	0.0004555	0	0	0	0	0	0	0	0	0	0.000224438
nitrate_respiration	0.00235318	0.00162181	0.00217897	0.00185262	0.00429365	0.00225325	0.00282927	0.0056249	0.00213264	0.0101978	0.0119144	0.00532481	0.00238266	0.00219201	0.00312133	0.00499258	0.00489855	0.00594865	0.00481672	0.00365781	0.0023666	0.00320402	0.00303072	0.00336381	0.00359663	0.00600984	0.00266487	0.00689487	0.00732998	0.00725202	0.00392575	0.00402991	0.00399298	0.00493506	0.00593514	0.00536898	0.00205592	0.0058835	0.00416616	0.00312563	0.000765742	0.00125675	0.00290716	0.00172342	0.0013918	0.00886788	0.00941934	0.00462691	0.00377642
nitrate_reduction	0.0223513	0.00478008	0.00877935	0.024733	0.0378171	0.032558	0.07072	0.0516021	0.0255709	0.0286276	0.0448926	0.0804956	0.00496763	0.00328802	0.00487507	0.0473494	0.0470702	0.0281209	0.00668375	0.00570946	0.0061056	0.0210282	0.0164427	0.0395869	0.0453651	0.068812	0.0692004	0.0535367	0.0830837	0.0319149	0.00830015	0.0202077	0.00997036	0.0346097	0.0222926	0.0153244	0.0105867	0.0132354	0.00668807	0.0231019	0.048389	0.0631366	0.0400972	0.0337064	0.0492384	0.0259946	0.0373431	0.0694363	0.0120806
nitrogen_respiration	0.00235318	0.00162181	0.00217897	0.00185262	0.00429365	0.00225325	0.00282927	0.0056249	0.00213264	0.0101978	0.0119144	0.00532481	0.00238266	0.00219201	0.00312133	0.00499258	0.00489855	0.00594865	0.00481672	0.00365781	0.0023666	0.00320402	0.00303072	0.00336381	0.00359663	0.00600984	0.00266487	0.00689487	0.00732998	0.00725202	0.00392575	0.00402991	0.00399298	0.00493506	0.00593514	0.00536898	0.00205592	0.0058835	0.00416616	0.00312563	0.000765742	0.00125675	0.00290716	0.00172342	0.0013918	0.00886788	0.00941934	0.00462691	0.00377642
fumarate_respiration	0	0	0	0	0	0	0	0	0	0	0	0	0	0	0	0	0	0	0	0	0	0	0	0	0	0	0	0	0	0	0	0	0	0	0	0	0	0	0	0	0	0	0	0	0	0	0	0	0
intracellular_parasites	0	0.00026827	9.51978e-05	0	7.50638e-05	0	3.55139e-05	0	0	0	0.00142323	0.000207798	0.000809207	0.00162633	0.00070793	0	0.0004407	0.000910799	6.62852e-05	5.86187e-05	0	0	0	0	0	3.54214e-05	0	0	0	0.000209769	0.000210308	0.000315746	0.0001089	0.000144676	0.000588741	0.000282578	0.000320404	0.000362212	0	0	0	0	0	0	3.89313e-05	0.00095013	0.000273465	0	0.000673315
chlorate_reducers	0	0	0	0	7.50638e-05	0	0	0	0	0	0	0	0	0	0	0	0.0001695	0.00011385	0	0	0	0	0	0	0	0	0	0	0	0	0	0	0	0	0.000190943	0.000217368	0	0	0	0	0	0	0	0	0	0	0	0	0
predatory_or_exoparasitic	0.00463692	0.00393869	0.0060715	0.00493244	0.00641045	0.00323726	0.0283282	0.00684033	0.0148871	0.0226072	0.0208604	0.0273514	0.0139588	0.011402	0.0125819	0.0165643	0.00681391	0.0253458	0.00694889	0.00811283	0.00722946	0.00440192	0.00658256	0.00356699	0.00992467	0.0118071	0.00895866	0.0108155	0.00901906	0.019988	0.0104593	0.0124304	0.0109505	0.0210905	0.0193966	0.0330834	0.00644812	0.0159863	0.00611036	0.00328947	0.00444719	0.00202277	0.00428424	0.0155652	0.00766947	0.00877043	0.0154204	0.00922124	0.0123929
chloroplasts	0	0	0	0	0	0	0	0	0	0	0	0	0	0	0	0	0	0	0	0	0	0	0	0	0	0	0	0	0	0	0	0	0	0	0	0	0	0	0	0	0	0	0	0	0	0	0	0	0
nonphotosynthetic_cyanobacteria	0	0	7.40427e-05	0.000200602	0	0.00012835	0	3.3919e-05	0.000144937	0	0.000284645	0.00044157	0.000427081	0.000159098	0.000466591	0.000625892	5.085e-05	0.000270393	0	8.20662e-05	0.000724027	4.32975e-05	0.000479978	0	0.000424131	1.77107e-05	0	5.40774e-05	0.000382434	0.000479473	0.000378554	8.3091e-05	0.000508198	0.000337577	0.000556917	0.00080426	3.33754e-05	0.000499266	0.000299963	0	0.000441774	5.98451e-05	0	0.00014513	0.000301718	0.000779594	0.000683662	0	0.000439119
photosynthetic_cyanobacteria	0.000362621	9.75526e-05	0.00104718	5.90005e-05	3.00255e-05	0	2.36759e-05	2.26127e-05	0.00182206	0	0.000365973	0	0	0	0.00378099	0.000131001	0.0002034	0	6.62852e-05	2.34475e-05	9.72573e-05	0.000129893	4.1141e-05	0	5.08958e-05	1.77107e-05	8.62164e-05	0	0	0	0.00107958	0.00184462	0.00217799	0	0	0	3.33754e-05	0.000225159	0.000166646	0.000592357	0.000265064	0.00037104	0	0	2.91985e-05	0	0	0	4.8791e-05
anoxygenic_photoautotrophy_H2_oxidizing	0	0	0	0	0	0	0	0	0	0	0	0	0	0	0	0	0	0	0	0	0	0	0	0	0	0	0	0	0	0	0	0	0	0	0	0	0	0	0	0	0	0	0	0	0	0	0	0	0
anoxygenic_photoautotrophy_S_oxidizing	0.00081011	0.00162181	0.00217897	0.00185262	0.00382825	0.00225325	0.000189407	0	0.00132513	0.00864152	0.00837671	0.00285722	0.00222532	0.00219201	0.00312133	0.00327501	0.0042375	0.00508055	0.00481672	0.00365781	0.0023666	0.00320402	0.00303072	0.00162547	0.00113667	5.31321e-05	0.000297838	0.00597556	0.00602333	0.00617321	0.00269194	0.00181138	0.00290399	0.00487076	0.00548961	0.00515161	0.00174887	0.00440529	0.00384397	0.00312563	0.000765742	0.00111312	0	0.000907062	0	0.00867298	0.00437544	0.00325839	0.00208825
anoxygenic_photoautotrophy_Fe_oxidizing	0	0	0	0	0	0	0	0	0	0	0	0	0	0	0	0	0	0	0	0	0	0	0	0	0	0	0	0	0	0	0	0	0	0	0	0	0	0	0	0	0	0	0	0	0	0	0	0	0
anoxygenic_photoautotrophy	0.00081011	0.00162181	0.00217897	0.00185262	0.00382825	0.00225325	0.000189407	0	0.00132513	0.00864152	0.00837671	0.00285722	0.00222532	0.00219201	0.00312133	0.00327501	0.0042375	0.00508055	0.00481672	0.00365781	0.0023666	0.00320402	0.00303072	0.00162547	0.00113667	5.31321e-05	0.000297838	0.00597556	0.00602333	0.00617321	0.00269194	0.00181138	0.00290399	0.00487076	0.00548961	0.00515161	0.00174887	0.00440529	0.00384397	0.00312563	0.000765742	0.00111312	0	0.000907062	0	0.00867298	0.00437544	0.00325839	0.00208825
oxygenic_photoautotrophy	0.000362621	9.75526e-05	0.00104718	5.90005e-05	3.00255e-05	0	2.36759e-05	2.26127e-05	0.00182206	0	0.000365973	0	0	0	0.00378099	0.000131001	0.0002034	0	6.62852e-05	2.34475e-05	9.72573e-05	0.000129893	4.1141e-05	0	5.08958e-05	1.77107e-05	8.62164e-05	0	0	0	0.00107958	0.00184462	0.00217799	0	0	0	3.33754e-05	0.000225159	0.000166646	0.000592357	0.000265064	0.00037104	0	0	2.91985e-05	0	0	0	4.8791e-05
photoautotrophy	0.00117273	0.00171937	0.00322615	0.00191162	0.00385828	0.00225325	0.000213083	2.26127e-05	0.00314719	0.00864152	0.00874268	0.00285722	0.00222532	0.00219201	0.00690232	0.00340601	0.0044409	0.00508055	0.00488301	0.00368125	0.00246385	0.00333391	0.00307186	0.00162547	0.00118757	7.08429e-05	0.000384055	0.00597556	0.00602333	0.00617321	0.00377152	0.003656	0.00508198	0.00487076	0.00548961	0.00515161	0.00178225	0.00463045	0.00401062	0.00371799	0.00103081	0.00148416	0	0.000907062	2.91985e-05	0.00867298	0.00437544	0.00325839	0.00213704
aerobic_anoxygenic_phototrophy	0	0	0	0	0	0	0	0	0	0	0	0	0	0	0	0	0	0	0	0	0	0	0	0	0	0	0	0	0	0	0	0	0	0	0	0	0	0	0	0	0	0	0	0	0	0	0	0	0
photoheterotrophy	0.00081011	0.00181692	0.00232706	0.00261962	0.00474403	0.00302335	0.000189407	0	0.00140795	0.0088463	0.00837671	0.00285722	0.00233771	0.00242182	0.00374881	0.00359524	0.00472905	0.00553595	0.0051371	0.00412676	0.00279885	0.0035937	0.00366155	0.0022463	0.00147598	5.31321e-05	0.000344865	0.00605667	0.0064695	0.00617321	0.00322472	0.00297466	0.00313389	0.00524048	0.00569646	0.00569503	0.00182897	0.00460108	0.00406617	0.00350373	0.000971903	0.00308801	0	0.0012336	0	0.00889225	0.00448178	0.00335614	0.00367884
phototrophy	0.00117273	0.00191447	0.00337423	0.00267862	0.00477406	0.00302335	0.000213083	2.26127e-05	0.00323001	0.0088463	0.00874268	0.00285722	0.00233771	0.00242182	0.00752981	0.00372624	0.00493245	0.00553595	0.00520338	0.0041502	0.00289611	0.00372359	0.00370269	0.0022463	0.00152687	7.08429e-05	0.000431082	0.00605667	0.0064695	0.00617321	0.0043043	0.00481928	0.00531188	0.00524048	0.00569646	0.00569503	0.00186235	0.00482624	0.00423282	0.00409609	0.00123697	0.00345905	0	0.0012336	2.91985e-05	0.00889225	0.00448178	0.00335614	0.00372763
plastic_degradation	0.000100299	0	0	0	0	0	0.00105358	0.000163942	0	0	0	0	0	0	0	0	0	0.000668868	0	0	0	0	0	0.000146743	0	0.000791079	0	0.00043262	0	0	0.000308452	0.0015538	0.001089	0	0	0	0	0.000293686	0	0	0	0	0	0	0	0	0.00138252	0	0.000761139
ureolysis	0.0240333	0.0063775	0.00831394	0.00853148	0.00385828	0.00362231	0.00256884	0.00227823	0.0138518	0.0105255	0.00585556	0.00958466	0.0104747	0.00726546	0.00506814	0.0103345	0.00839026	0.0102038	0.00800946	0.00522879	0.00789946	0.00531116	0.00489578	0.0147646	0.00941572	0.00734404	0.00626244	0.00386654	0.00522659	0.00940965	0.0120296	0.0267138	0.00598947	0.00945216	0.00911753	0.00889034	0.0234896	0.00784141	0.00423282	0.0067806	0.00695058	0.0072652	0.00429324	0.0169802	0.00446737	0.0141058	0.00935857	0.00925383	0.0104315
reductive_acetogenesis	6.17227e-05	4.87763e-05	8.46203e-05	0	0	0	0	0	0	0	0	0	0	0	0.000128715	0.000131001	0	9.96186e-05	0	0	8.6451e-05	0	0	0	0	0	0	0.000162232	0	0	5.60821e-05	9.97092e-05	0	0	0	0	0.0042053	0	0.000111098	0.000126033	0	0	0	0	0	0	0	0	0
chemoheterotrophy	0.385852	0.379907	0.376074	0.382984	0.387104	0.392079	0.276511	0.178584	0.370458	0.309907	0.31498	0.329022	0.366706	0.386325	0.358905	0.335201	0.372443	0.358086	0.385824	0.365617	0.390877	0.381783	0.377537	0.401693	0.340052	0.239089	0.26604	0.310188	0.349799	0.346509	0.35399	0.321479	0.330546	0.368056	0.343856	0.348593	0.395004	0.353431	0.368955	0.384226	0.399246	0.382937	0.373017	0.384359	0.326614	0.314079	0.316581	0.360313	0.348221
[truncated: 95 more columns]
