# Supplementary material for: Influence of organic, synthetic and biofertilizers on the diversity of cassava rhizosphere microbiome in Northeastern Thailand
Source: PeerJ. 2025 Oct 3;13:e20085. doi: 10.7717/peerj.20085 (PMC12499567; doi:10.7717/peerj.20085)
Supplement: Supplemental Information 8 [file peerj-13-20085-s008.xlsx]

## Sheet: permanova-pairwise for beta ana
The difference of beta diversity was tested for each treatment by permutational multivariate analysis of variance (PERMANOVA) for both sites, Nampong and Seungsang.
Group 1	Group 2	Sample size	Permutations	pseudo-F	p-value	q-value
T1	T2	36	999	0.419762	0.967	0.996
T1	T3	36	999	1.15134	0.279	0.616
T1	T4	36	999	0.323462	0.996	0.996
T1	T5	36	999	1.49144	0.133	0.532
T1	T6	36	999	1.41642	0.143	0.532
T1	T7	36	999	0.359589	0.989	0.996
T1	T8	36	999	1.741	0.072	0.532
T2	T3	36	999	0.846833	0.536	0.938
T2	T4	36	999	0.545257	0.902	0.996
T2	T5	36	999	1.30747	0.194	0.5432
T2	T6	36	999	0.998089	0.405	0.756
T2	T7	36	999	0.423814	0.97	0.996
T2	T8	36	999	1.30025	0.218	0.554909
T3	T4	36	999	1.10453	0.303	0.616
T3	T5	36	999	0.619191	0.847	0.996
T3	T6	36	999	0.446294	0.982	0.996
T3	T7	36	999	1.104	0.308	0.616
T3	T8	36	999	0.496641	0.961	0.996
T4	T5	36	999	1.47814	0.133	0.532
T4	T6	36	999	1.40707	0.16	0.532
T4	T7	36	999	0.415246	0.98	0.996
T4	T8	36	999	1.70113	0.09	0.532
T5	T6	36	999	0.795634	0.607	0.996
T5	T7	36	999	1.67297	0.086	0.532
T5	T8	36	999	0.734685	0.701	0.996
T6	T7	36	999	1.43607	0.171	0.532
T6	T8	36	999	0.502015	0.98	0.996
T7	T8	36	999	1.71297	0.076	0.532
