# Supplementary material for: Influence of organic, synthetic and biofertilizers on the diversity of cassava rhizosphere microbiome in Northeastern Thailand
Source: PeerJ. 2025 Oct 3;13:e20085. doi: 10.7717/peerj.20085 (PMC12499567; doi:10.7717/peerj.20085)
Supplement: Supplemental Information 9 [file peerj-13-20085-s009.xlsx]

## Sheet: correlation_starch
Results of the Spearman correlation coefficient analysis of six target bacterial genera associated with starch at the harvest stage of 10 MAP grown in Nampong and Seungsang
location	bacteria	Spearman correlation coefficient	P-value
NP	46_Tumebacillus	-0.071382	0.740302
NP	47_Bacillus	-0.221545	0.298151
NP	50_Paenibacillus	0.052666	0.806917
NP	51_Lysinibacillus	0.127095	0.553982
NP	54_Dongia	0.124483	0.56222
NP	64_Sphingomonas	0.206311	0.333435
SS	46_Tumebacillus	0.322384	0.124441
SS	47_Bacillus	0.32717	0.118632
SS	50_Paenibacillus	0.207092	0.331569
SS	51_Lysinibacillus	-0.0735262	0.732775
SS	54_Dongia	0.154884	0.469898
SS	64_Sphingomonas	-0.177072	0.407821
